# Supplementary material for: Efficacy of Telephone Nursing Follow-Up on Erectile Function and Sexual Satisfaction in Turkish Men After TUR-Prostatectomy: A Cross-Sectional Study
Source: Research Square preprint supplement (doi:10.21203/rs.3.rs-7254537/v1), 2025-07-31
Supplement: Supplementary file 1 [file a2cc3797e50847b7a65e9bbb.docx]

**Table I.** Mean Scores of Patients' New Sexual Satisfaction Scale

| **New Sexual Satisfaction Scale;** | **Ortalama±ss** | **Medyan** | **Min** | **Max** |
| --- | --- | --- | --- | --- |
| **Self-Centered Subscale (1-10)** | 40.66±7.62 | 42 | 20 | 50 |
| **Spouse-Partner/Sexual Activity-Centered Subscale (11-20)** | 40.33±10.27 | 42 | 20 | 50 |
| **NSSS TOTAL** | 80,66±20,54 | 84 | 40 | 100 |

NSSS: New Sexual Satisfaction Scale

The mean IIEF-5 scoreS of the patients was 19.59±5.32 (min:10, max:25, median:20) (Table II).

**Table II.** International Index of Erectile Function Scores of Patients

|  | **X±ss** | **Median** | **Min** | **Max** |
| --- | --- | --- | --- | --- |
| International Index of Erectile Function Scores | 19,59±5,32 | 20 | 10 | 25 |

IIEF: International Index of Erectile Function; X: Mean; SD: standard deviation

No statistically significant differences were observed between patients' age, body mass index (BMI), smoking and alcohol consumption status, and the mean scores of the New Sexual Satisfaction Scale Self-Centered Subscale, Spouse-Partner/Sexual Activity-Centered Subscale, and the IIEF-5 total score (p > 0.05) (Table III).

**Table III.** Comparison of Patients Characteristics with Sexual Satisfaction and Erectile Function Scores

| **Characteristics**  **Of Patients** | | **n(%)** | **Self-Centered Subscale** | **Spouse-Partner/Sexual Activity-Centered Subscale** | **Sexual Satisfaction Scale Total Score** | **Erectile Function Score** |
| --- | --- | --- | --- | --- | --- | --- |
| Postoperative  Complications | Yes | 25(26) | 39,24±10,86 | 39,24±10,86 | 76,88±22,89 | 20,08±5,27 |
| No | 71(74) | 40,71±10,10 | 40,71±10,10 | 81,43±20,21 | 19,42±5,36 |
| **Test Value/p (U)** | | | *531,000/0,88 | 531,000/0,88 | 531,000/0,88 | 555,500/0,916 |
| Previous Erectile Dysfunction | Yes | 32(33) | 41,28±9,07 | 41,28±9,07 | 82,56±18,15 | 18,96±8,65 |
| No | 64(67) | 39,85±10,85 | 39,85±10,85 | 79,09±22,21 | 19,90±5,16 |
| **Test Value/p (U)** | | | *1009,000/0,90 | 1009,000/0,90 | 996,000/0,82 | 944,500/0,52 |

*Mann Whitney U; **Kruskal Wallis-H

No statistically significant differences were found between postoperative complication status or history of erectile dysfunction and the mean scores of the Sexual Satisfaction Scale Self-Centered Subscale, Partner-Centered Subscale, and total IIEF-5 score (p > 0.05) (Table IV).

**Tablo IV.** Comparison of Sexual Satisfaction Status and Erectile Dysfunction Status of Patients with Surgery Period Characteristics

| **Characteristics**  **Of Patients** | | **n(%)** | **Self-Centered Subscale** | **Spouse-Partner/Sexual Activity-Centered Subscale** | **Sexual Satisfaction Scale Total Score** | **Erectile Function Score** |
| --- | --- | --- | --- | --- | --- | --- |
| **Age groups** | 50-64 | 45(46,9) | 42,771±8,05/ | 42,771±8,05 | 85,422±16,10 | 19,33±5,14 |
| 65 🡹 | 51(53,2) | 38,235±11,56 | 38,235±11,56 | 75,686±23,61 | 19,823±5,51 |
| **Test Değeri/p (U)** | | | *945,500/ 0,130 | 945,500/ 0,130 | 928,000/0,100 | 1075,000/0,585 |
| **BMI Group** | 18,5-24,9 | 43(44,8) | 39,00±10,77 | 39,00±10,77 | 78,00±21,55 | 19,16±5,35 |
| 25-29,9 | 37(38,5) | 39,72±10,40 | 39,72±10,40 | 79,45±20,81 | 20,72±5,05 |
| 30-39,9 | 16(16,7) | 45,31±7,10 | 45,31±7,10 | 88,12±18,65 | 18,12±5,63 |
| **Test Value/p (U)** | | | **0,044/0,83 | 0,044/0,83 | 0,044/0,83 | 1,954/0,16 |
| **Alcohol Use** | Yes | 32(33,3) | 37,187±11,63 | 37,187±11,63 | 74,375±23,27 | 20,156±4,88 |
| No | 64(66,7) | 41,906±9,21 | 41,906±9,21 | 83,187±19,15 | 19,312±5,54 |
| **Test Value/p (U)** | | | *799,500/0,075 | 799,500/0,075 | 810,500/0,090 | 968,000/0,655 |
| **S Use** | Yes | 22(22,9) | 42,227±9,44 | 42,227±9,44 | 84,454±18,89 | 19,863±4,61 |
| No | 74(77,1) | 39,770±10,49 | 39,770±10,49 | 79,000±21,44 | 19,513±5,54 |
| **Test Value/p (U)** | | | *707,000/0,341 | 707,000/0,341 | 700,500/0,312 | 793,500/0,855 |
